# Supplementary material for: High pH promoting the synthesis of V-Silicalite-1 with high vanadium content in the framework and its catalytic performance in selective oxidation of styrene
Source: Royal Society of Chemistry journal article supplement (doi:10.1039/c8dt02042f), 2018-01-01
Supplement: c8dt02042f1.pdf [file c8dt02042f1.pdf]

## Electronic supplementary information

for

**High pH promoting the synthesis of V-Silicalite-1 with high vanadium content in the  
framework and their catalytic performances on selective oxidation of styrene**

by

Jing Zhao<sup>1</sup>, Yifu Zhang<sup>1,\*</sup>, Fuping Tian<sup>1</sup>, Yi Zuo<sup>2</sup>, Yang Mu<sup>1</sup>, Changgong Meng<sup>1</sup>

<sup>1</sup> *School of Chemistry, Dalian University of Technology, Dalian 116024, PR China*

<sup>2</sup> *School of Chemical Engineering, Dalian University of Technology, Dalian 116024, PR China*

\*Corresponding author. E-mail address: yfzhang@dlut.edu.cn

**Table S1**

Experiments of samples with different vanadium content in the system of fixing the amount of NaOH

| V/Si (n/n) | m (VOSO <sub>4</sub> /g) | m (NaOH/g) | pH    | Silicalite-1 |
|------------|--------------------------|------------|-------|--------------|
| 0          | 0                        |            | 9     | No           |
| 0.02       | 0.10                     | 0.06       | 8-9   | No           |
| 0.10       | 0.49                     |            | 7     | No           |
| 0.20       | 0.98                     |            | 6     | No           |
| 0          | 0                        |            | 12    | Yes          |
| 0.02       | 0.10                     | 0.24       | 11-12 | Yes          |
| 0.10       | 0.49                     |            | 10    | No           |
| 0.20       | 0.98                     |            | 9     | No           |
| 0          | 0                        |            | 14    | Yes          |
| 0.02       | 0.10                     | 0.79       | 14    | Yes          |
| 0.10       | 0.49                     |            | 14    | Yes          |
| 0.20       | 0.98                     |            | 14    | Yes          |

**Table S2**

Experiments about the synthesis of 0.20V-Silicalite-1 in different pH conditions

| V/Si (n/n) | m (VOSO <sub>4</sub> /g) | m (NaOH/g) | pH | Silicalite-1 |
|------------|--------------------------|------------|----|--------------|
| 0.2        | 0.98 g                   | 0.41       | 11 | No           |
| 0.2        | 0.98 g                   | 0.52       | 12 | Yes          |
| 0.2        | 0.98 g                   | 0.62       | 13 | Yes          |
| 0.2        | 0.98 g                   | 0.79       | 14 | Yes          |

Fig. S1

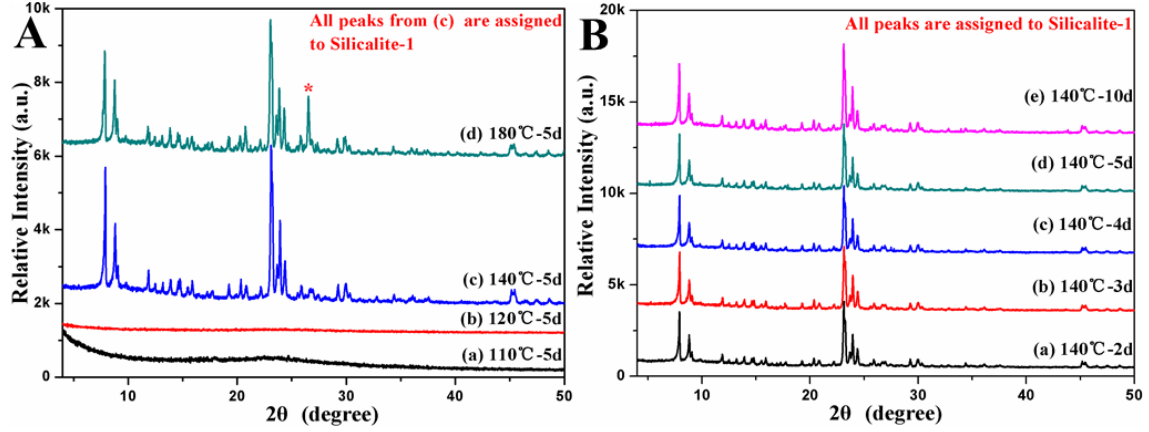

Fig. S1. XRD patterns of different temperatures and time.

Fig. S2

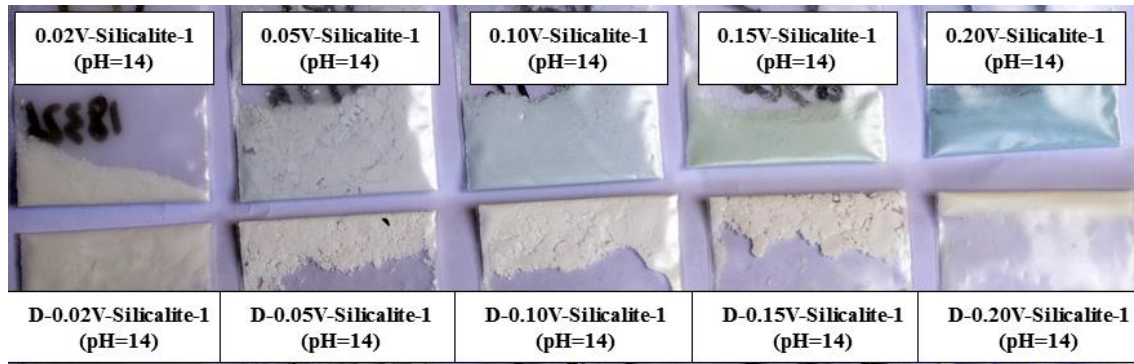

Fig. S2. Colors of the different vanadium content Silicalite-1 (before and after calcination) in conditions of pH=14

Fig. S3

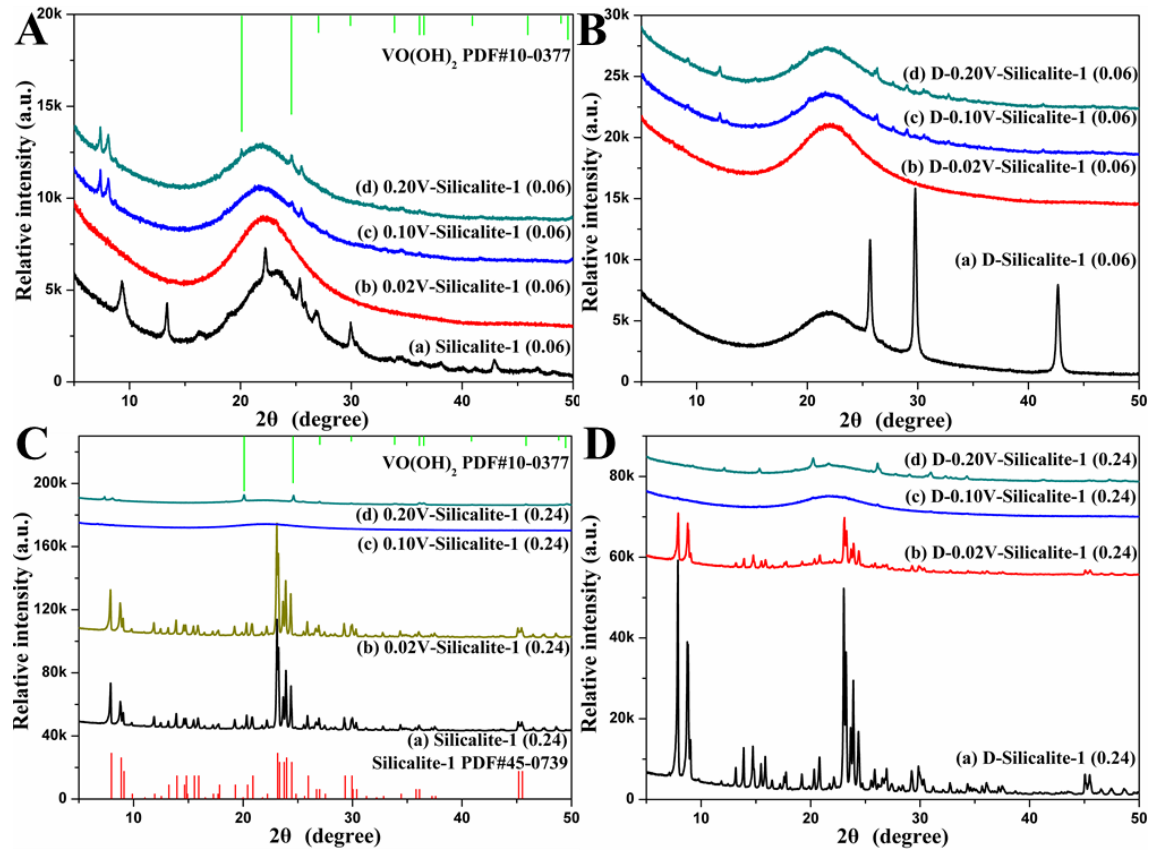

Fig. S3. XRD patterns of different amount of NaOH for the Silicalite-1 and V-Silicalite-1.

**Fig. S4**

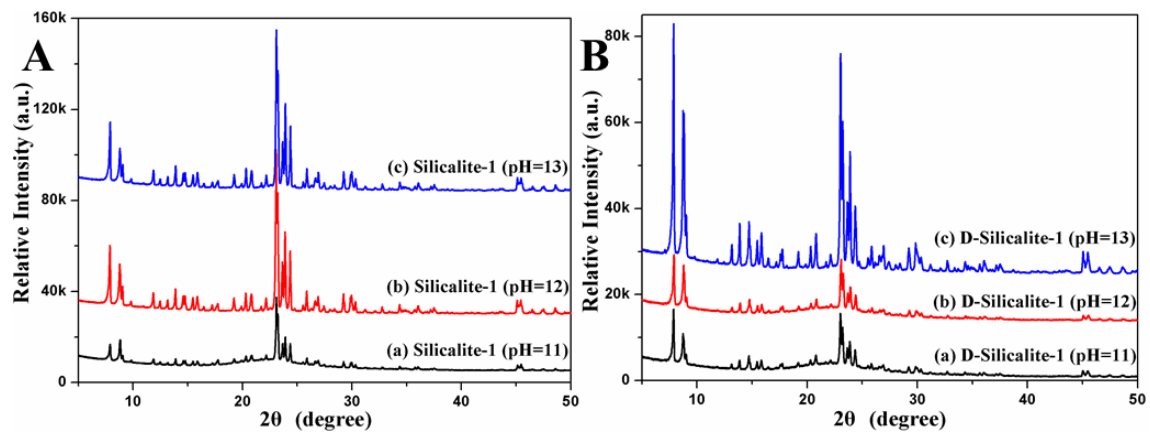

Fig. S4. XRD patterns of Silicalite-1 under different pH conditions.

**Fig. S5**

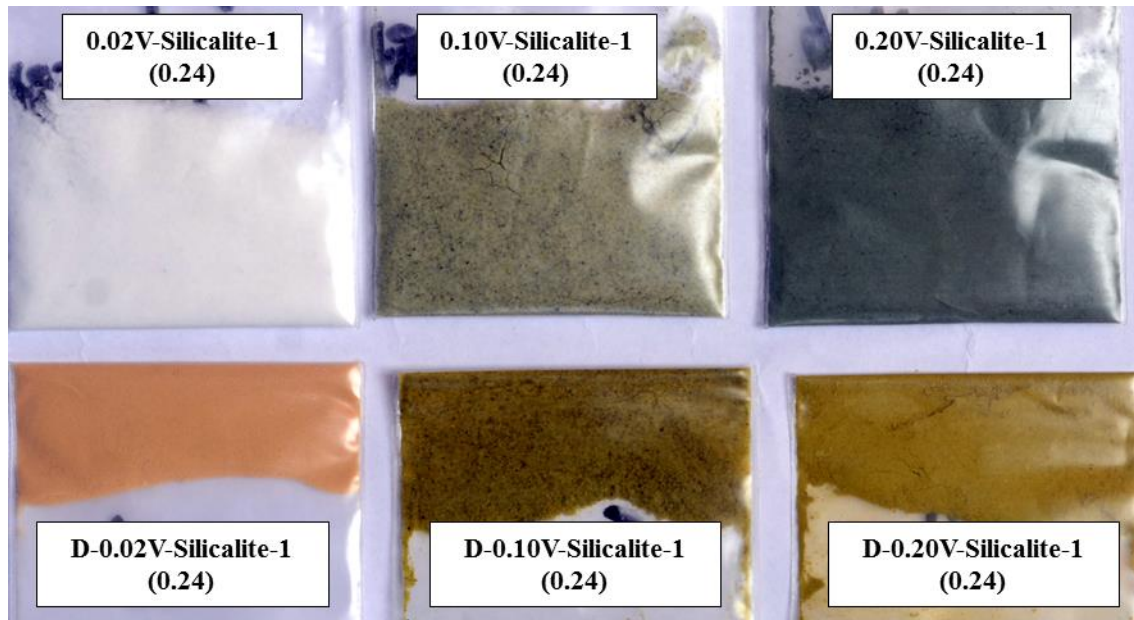

Fig. S5. Colors of the samples (before and after calcination) with different vanadium content in the system of 0.24 g NaOH.

**Fig. S6**

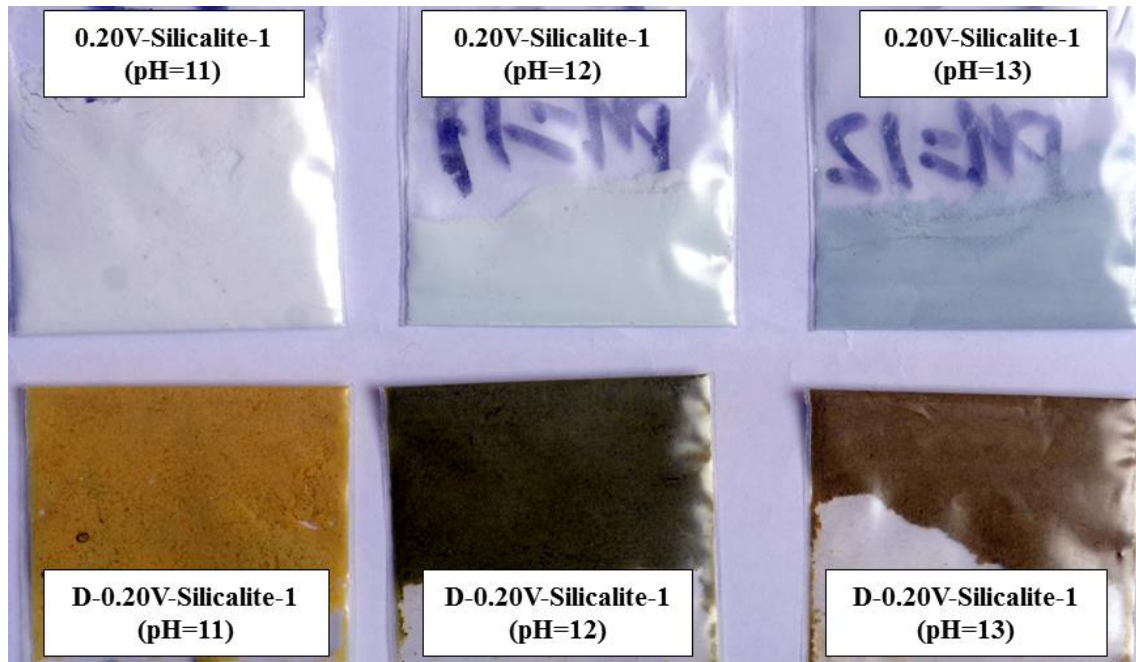

Fig. S6. Colors of the 0.20V-Silicalite-1 (before and after calcination) in different pH value conditions

**Fig. S7**

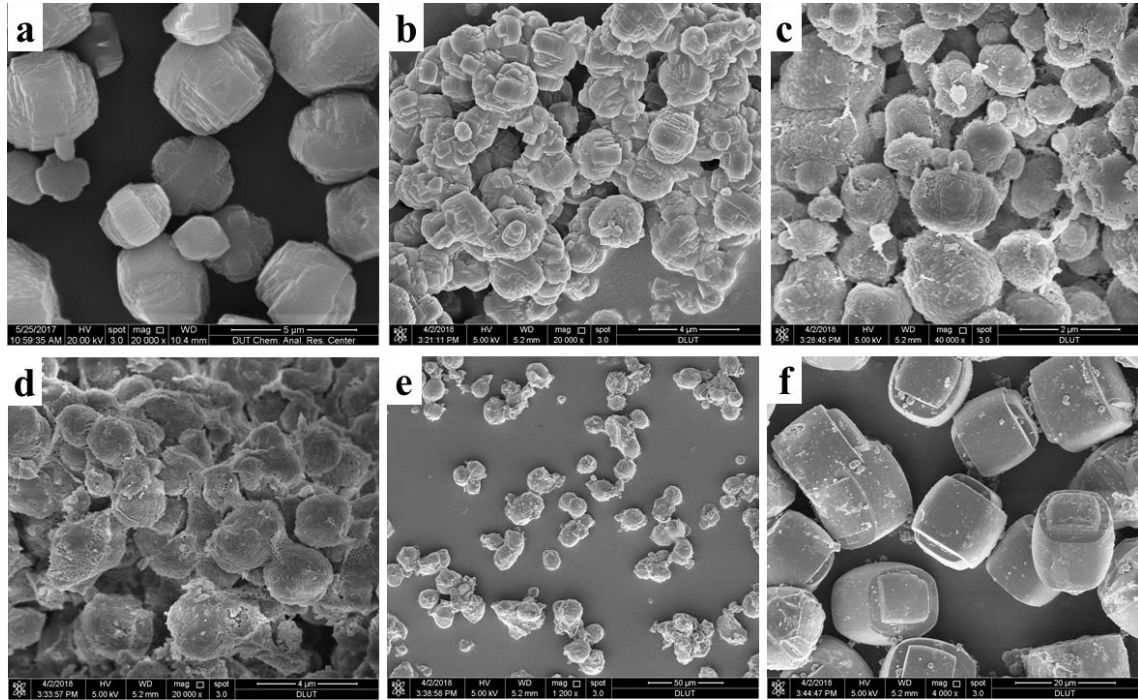

**Fig. S7.** FE-SEM images of D-Silicalite-1 (a) and D-V-Silicalite-1 (b-f) of different vanadium content.



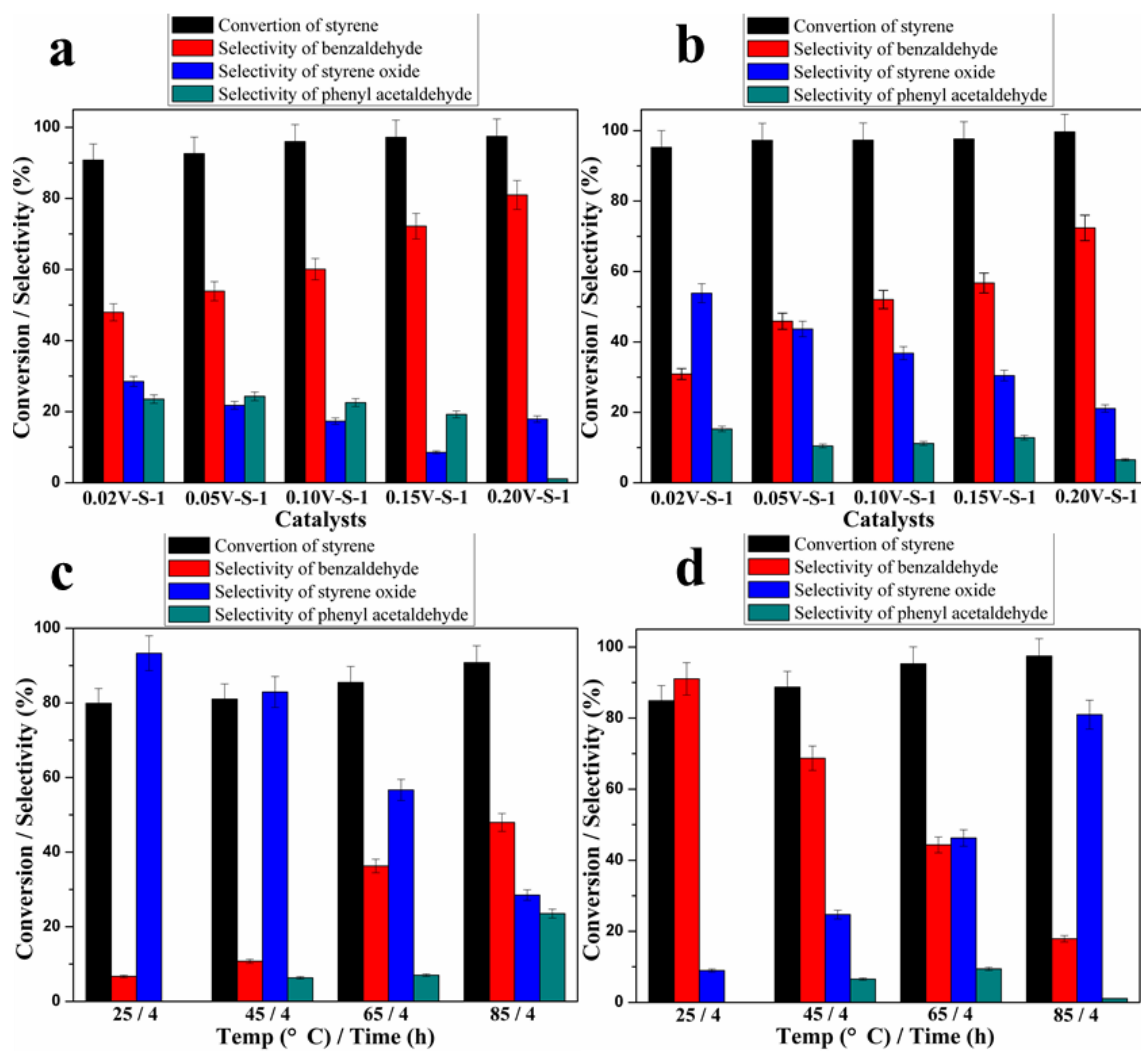

**Fig. S8.** The catalytic effects and the uncertainty of the conversions and selectivities

(a) different catalysts at 85 °C for 4 h (b) different catalysts at 85 °C for 12 h

(c) D-0.02V-Silicalite-1 at different temperatures for 4 h (d) D-20V-Silicalite-1 at

different temperatures for 4 h.
